# Supplementary material for: A detailed description of the development of the hemichordate Saccoglossus kowalevskii using SEM, TEM, Histology and 3D-reconstructions
Source: PubMed Central journal article supplement (PMC4081662; doi:10.1186/1742-9994-10-53), 2013-09-06
Supplement: 1742-9994-10-53-S1.pdf [file 1742-9994-10-53-S1.pdf]

dorsal

ventral

left

right

merge

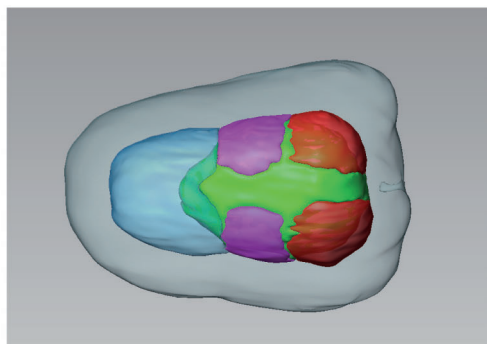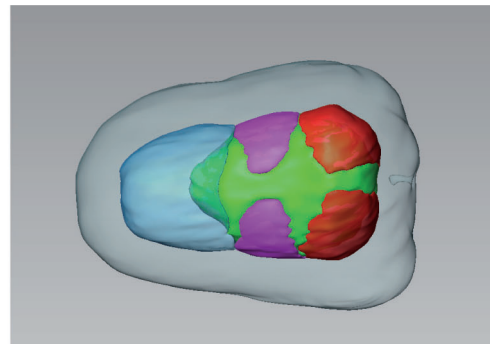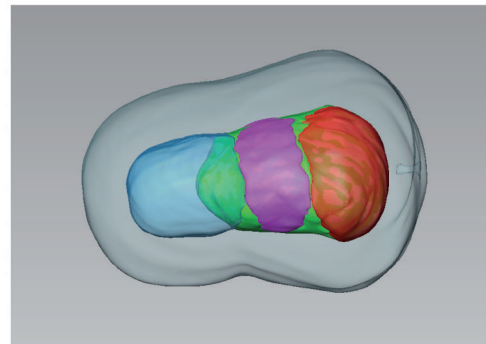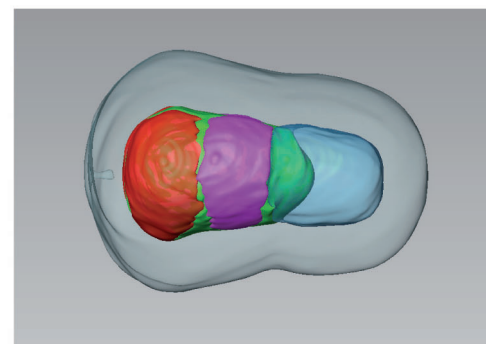

epidermis

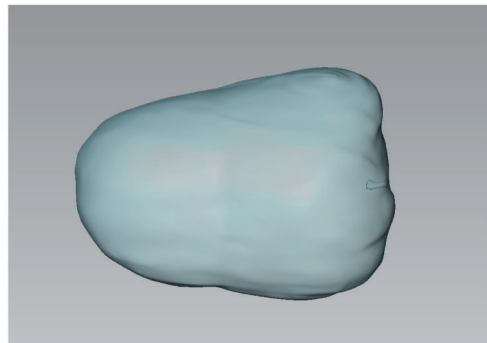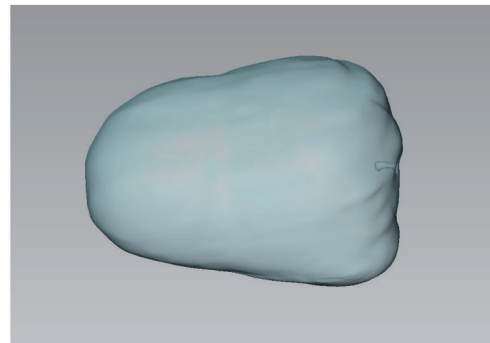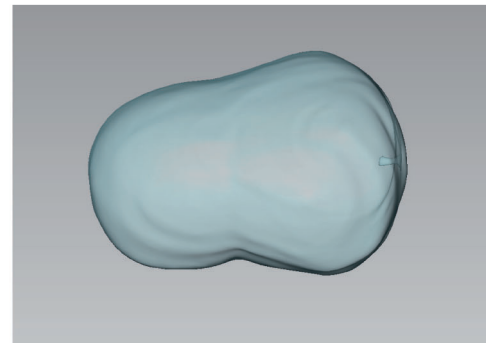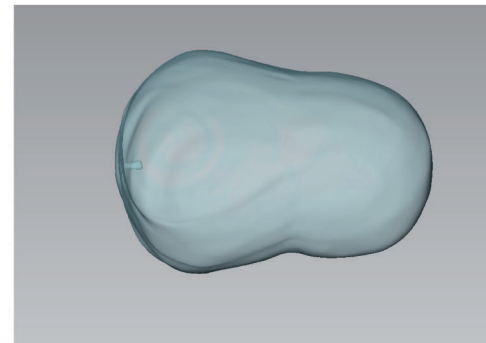

endoderm

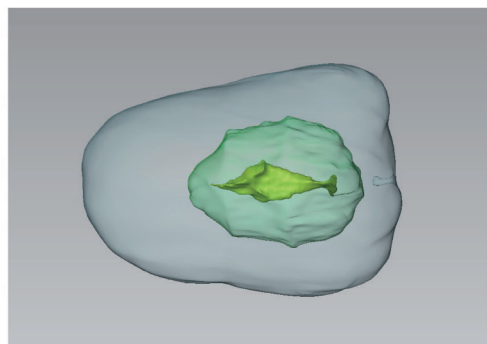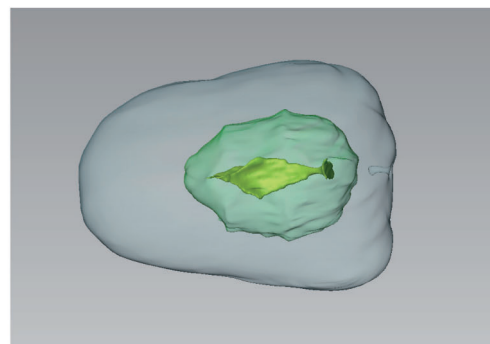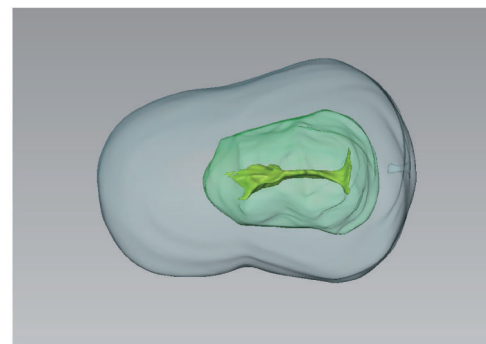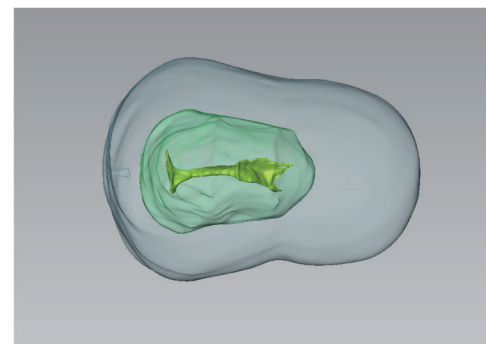

mesoderm

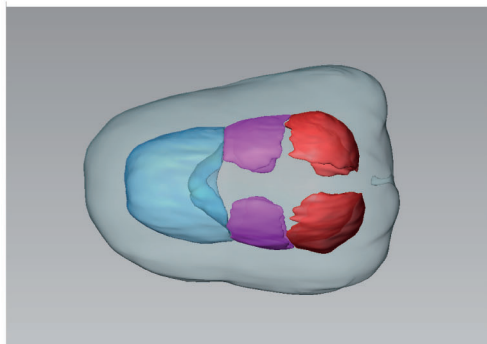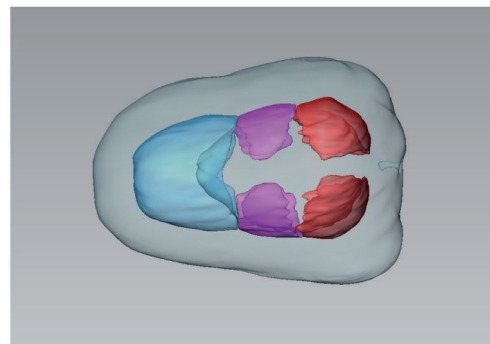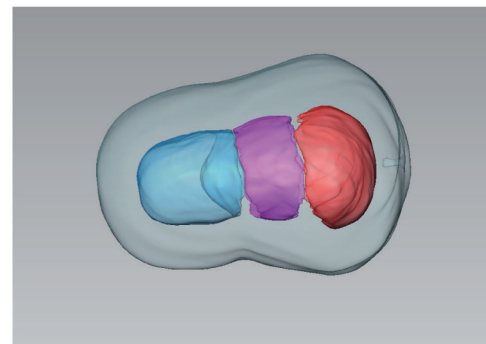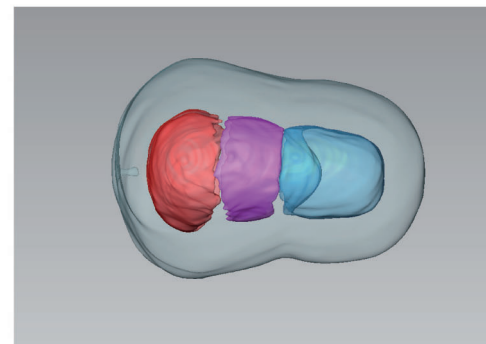

 epidermis  protocoel  mesocoel  metacoel  endoderm  lumen of endoderm
