# Supplementary material for: A detailed description of the development of the hemichordate Saccoglossus kowalevskii using SEM, TEM, Histology and 3D-reconstructions
Source: PubMed Central journal article supplement (PMC4081662; doi:10.1186/1742-9994-10-53), 2013-09-06
Supplement: 1742-9994-10-53-S3.pdf [file 1742-9994-10-53-S3.pdf]

dorsal

ventral

left

right

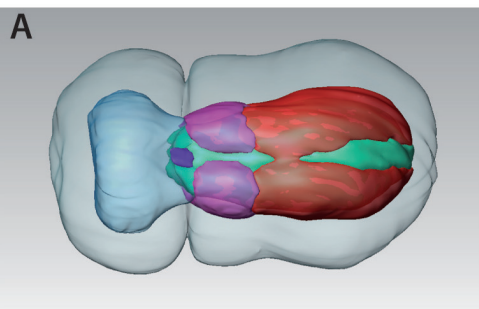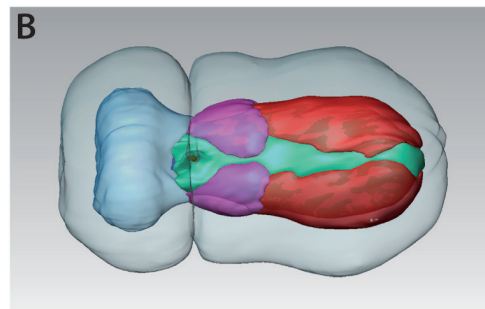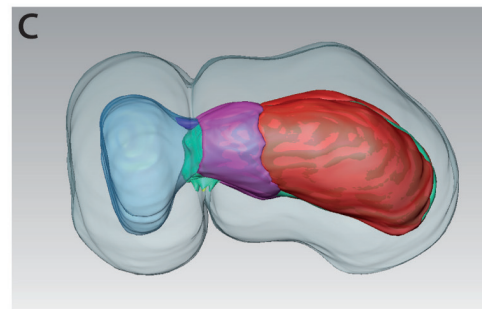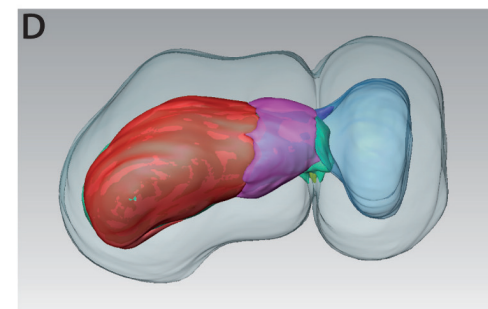

merge

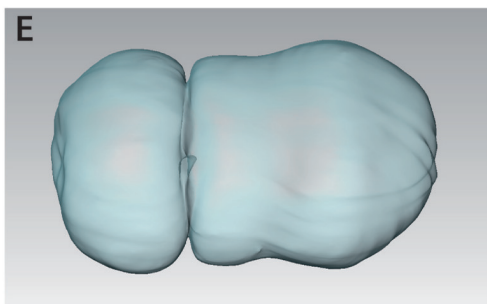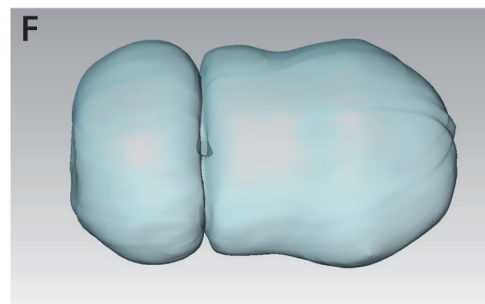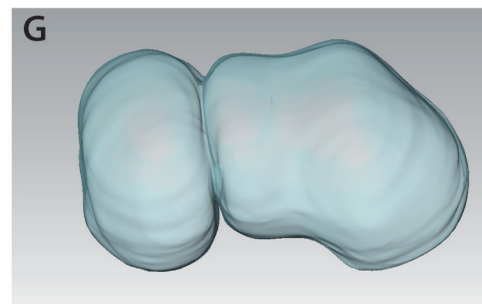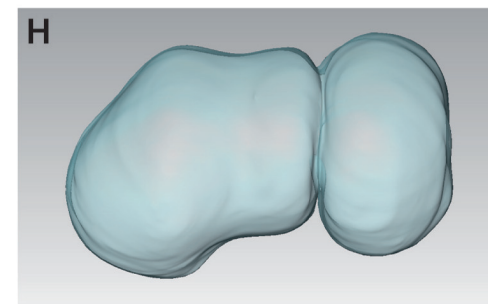

epidermis

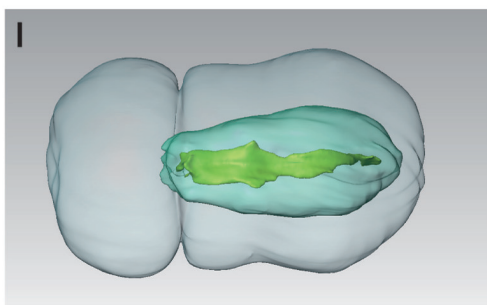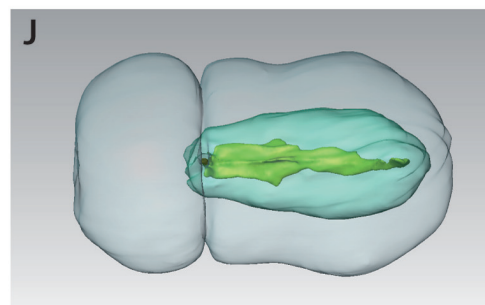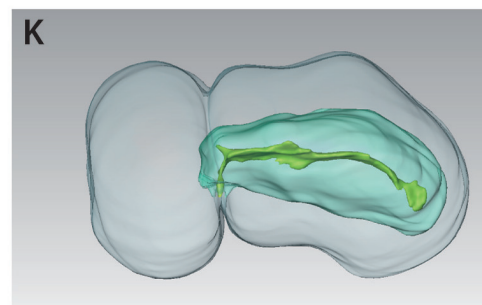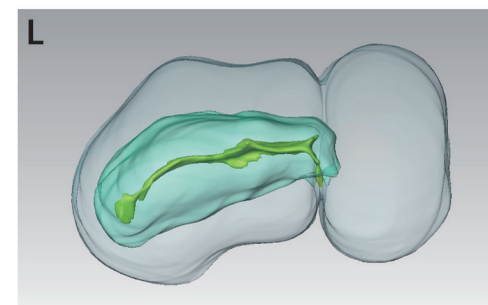

endoderm

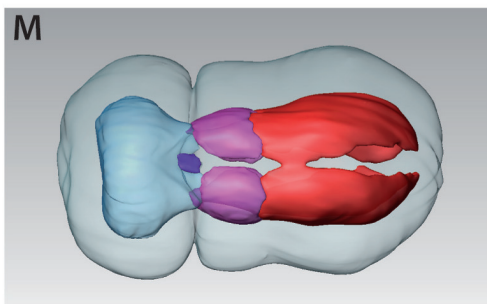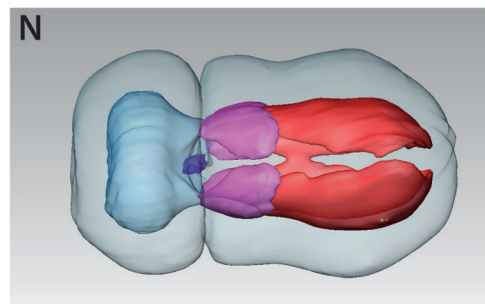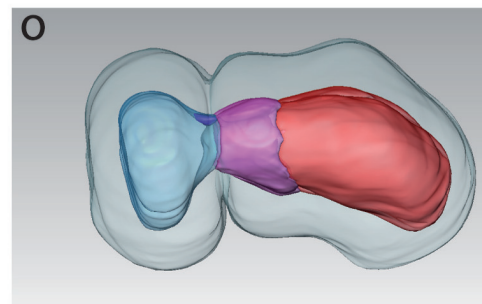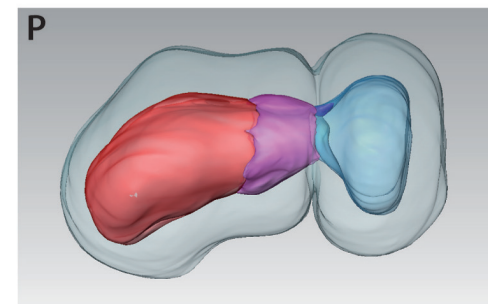

mesoderm

epidermis
  protocoel
  mesocoel
  metacoel
  endoderm
  lumen of endoderm
   
 *anlage* of pericardium
