# Supplementary material for: A detailed description of the development of the hemichordate Saccoglossus kowalevskii using SEM, TEM, Histology and 3D-reconstructions
Source: PubMed Central journal article supplement (PMC4081662; doi:10.1186/1742-9994-10-53), 2013-09-06
Supplement: 1742-9994-10-53-S6.pdf [file 1742-9994-10-53-S6.pdf]

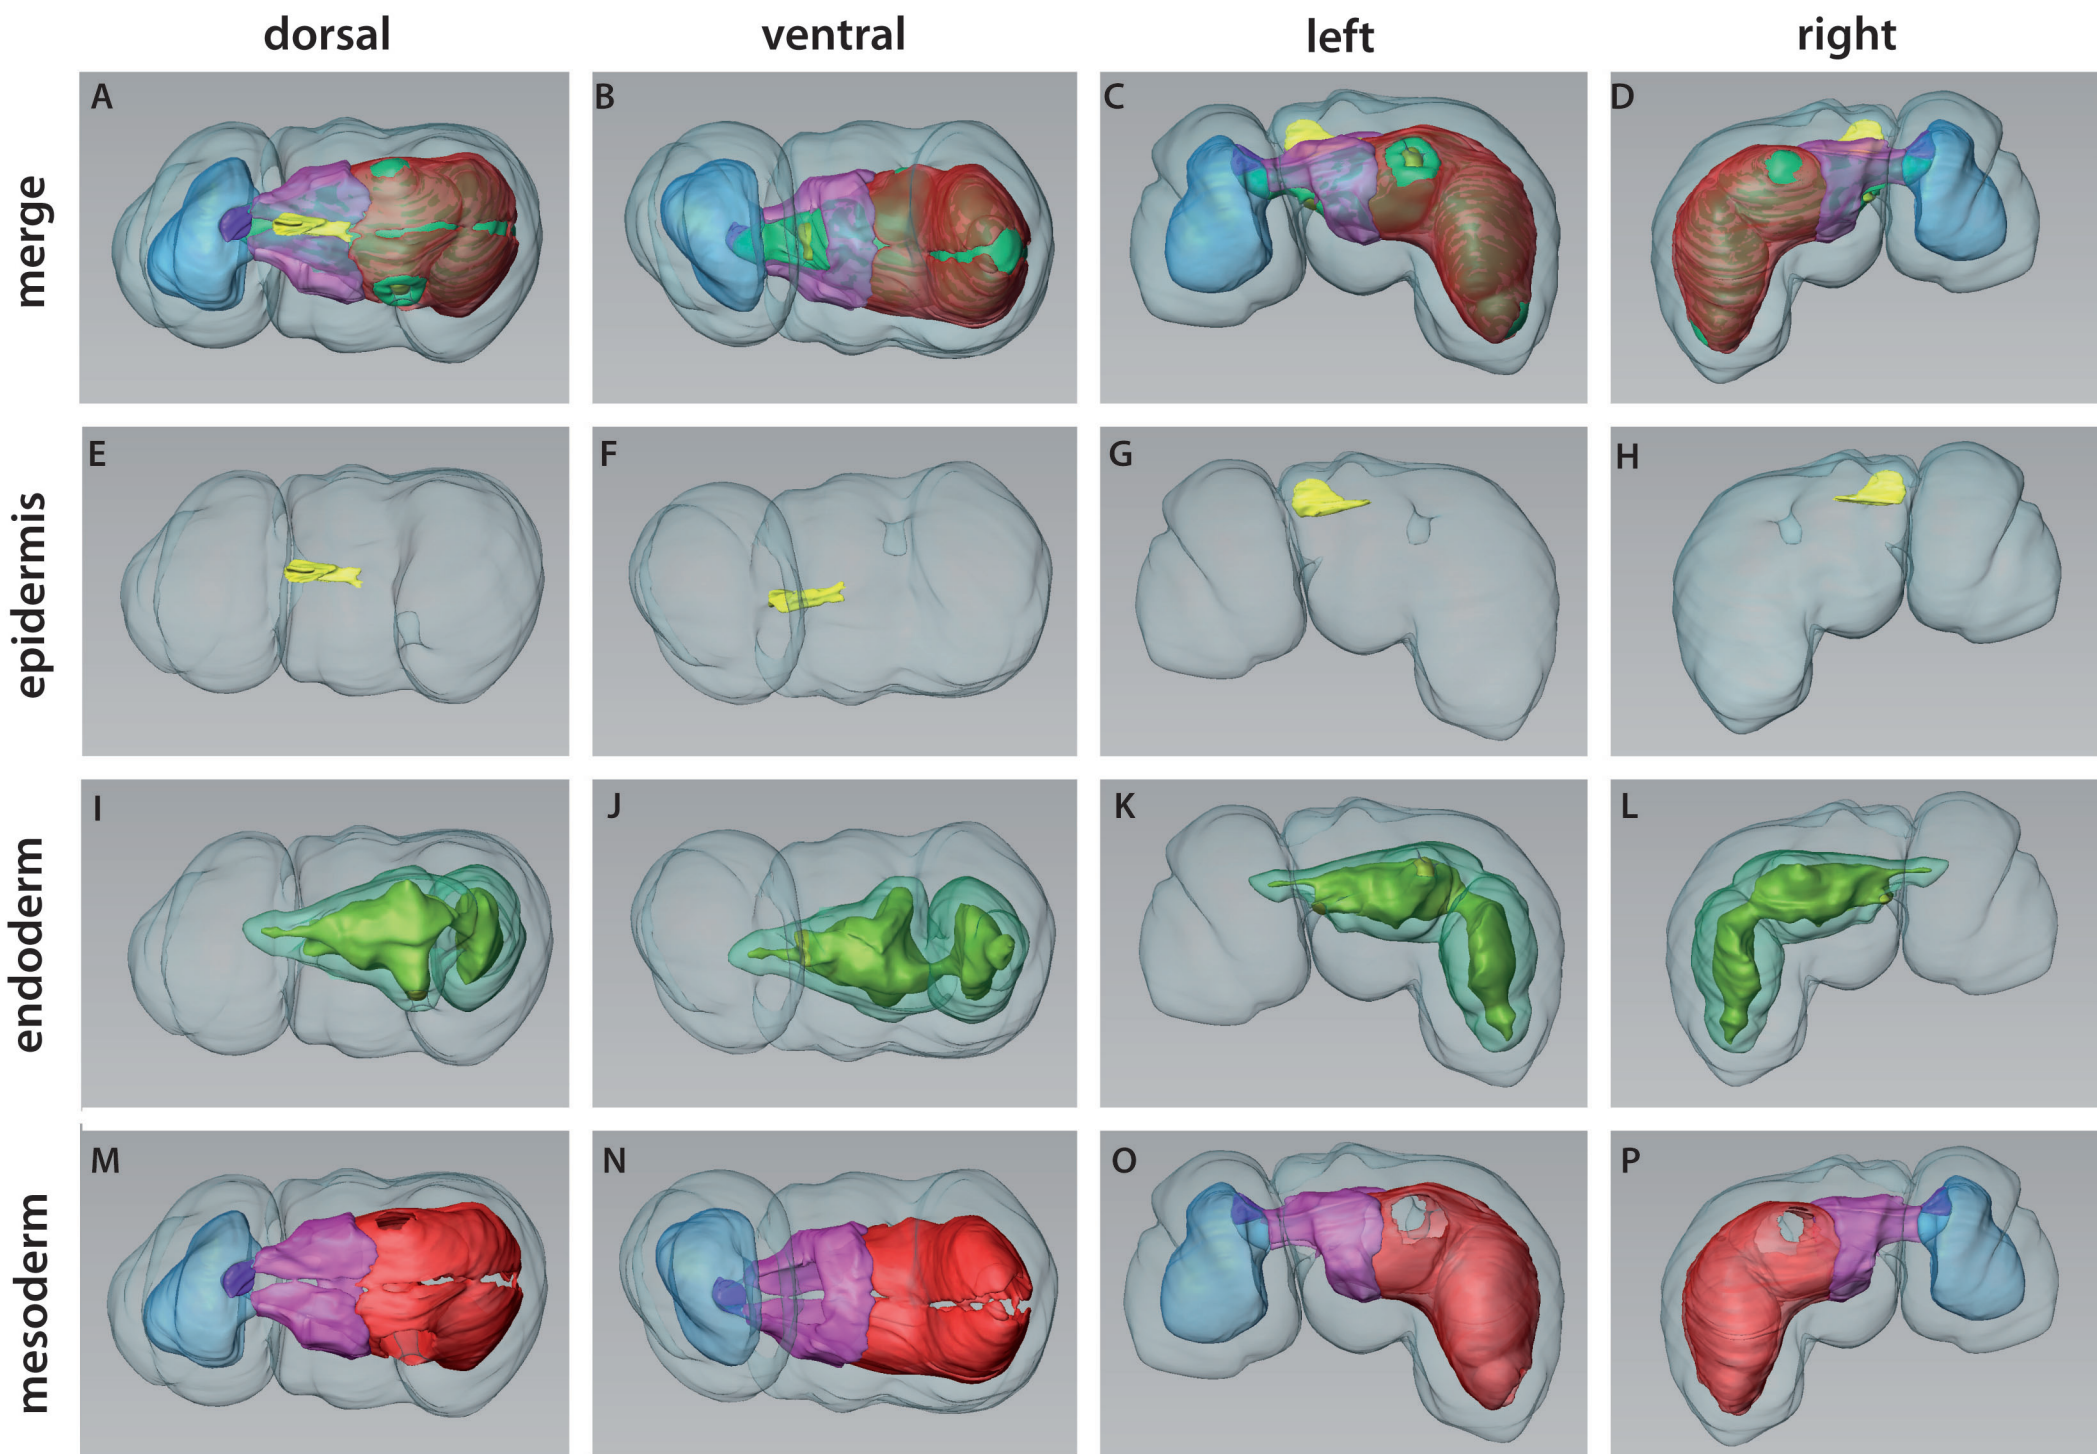

epidermis  
  protocoel  
  mesocoel  
  metacoel  
  endoderm  
  lumen of endoderm  
 pericardium  
  collar cord
